# Supplementary material for: The inflated mitochondrial genomes of siphonous green algae reflect processes driving expansion of noncoding DNA and proliferation of introns
Source: PubMed Central journal article supplement (PMC6944098; doi:10.7717/peerj.8273), 2020-01-03
Supplement: peerj-08-8273-s002.pdf [file peerj-08-8273-s002.pdf]

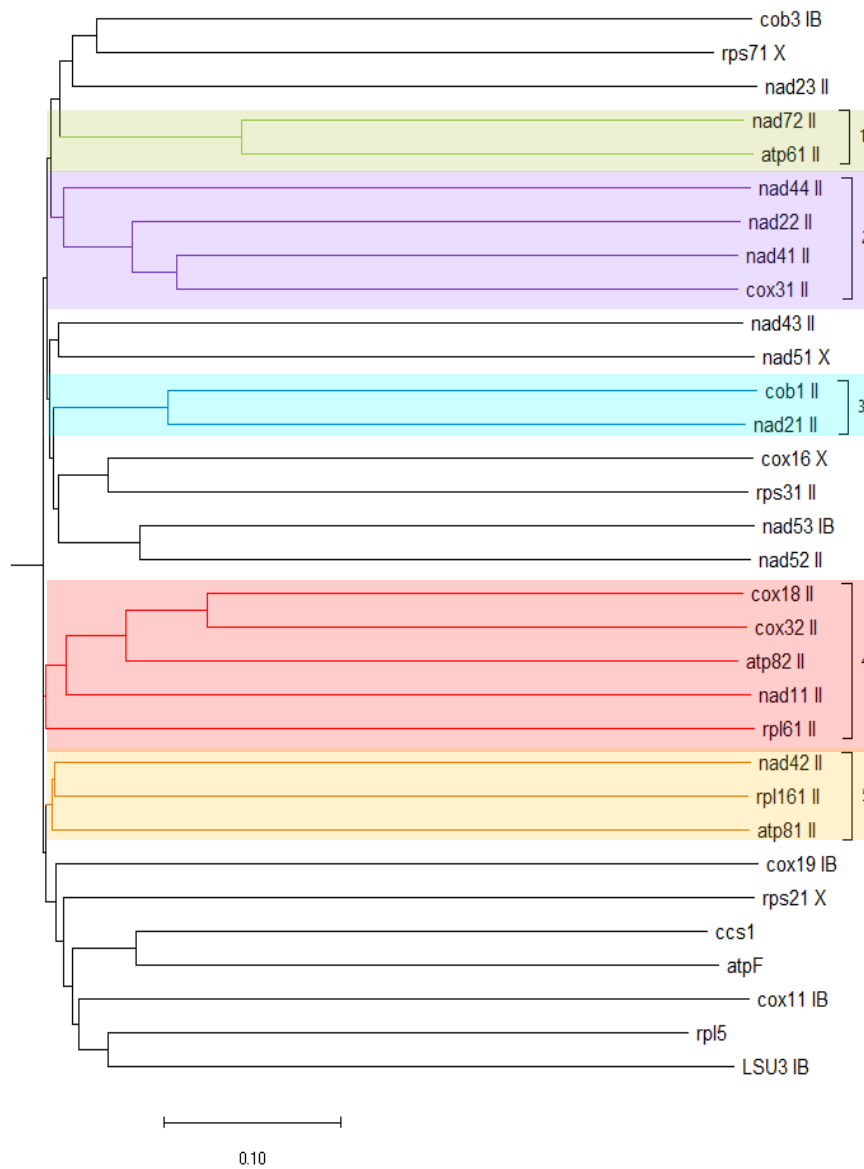

**Neighbour joining tree from Clustal Omega distance matrix of ORF-lacking introns in *Ostreobium quekettii* mitochondrial and chloroplast genomes, and MAFFT alignments corresponding to clusters.**





cox31\_II 778 --- TAA --- ----- GATTTGTTTCGAAGC  
nad22\_II 850 GCTTCC --- ----- TTTCCTTTGAGGAA  
nad41\_II 649 --- TTTTCC --- ----- CTTCCCTTCCAGCAA  
nad44\_II 2585 TTTTCCGAGGTTAGCGGAGCTAGCGTGGTTATCGTGCATAGCGCACGATAACGTGATAGTTGGCCCTAGGGCGTTAGCCTTGACGGTATCGCTGCGAAGCGG

cox31\_II 799 GTC -----  
nad22\_II 876 GCG -----  
nad41\_II 688 GCG -----  
nad44\_II 2695 AACCTTCGGCTTCCATTAGCAACACGCAAGTCTAGCAACCTTCGGTGGCTGGCGAAGTATGTTATACAATACAATTCAATGGTTAGGTAGCGGGGGTTCTTCCT

cox31\_II 802 -----  
nad22\_II 879 -----  
nad41\_II 691 -----  
nad44\_II 2805 CGATGCTCATGCAGGTACCGCGAAGCTTAGGTTAACAAAAATGCTGTTAGGGCTAAGTGGCGAAGACCCGTAATACTCTTTGTAGAGGAAAGGGTCCAAGTCCCC

cox31\_II 802 -----  
nad22\_II 879 -----  
nad41\_II 691 -----  
nad44\_II 2915 GTATCTCTTACGGACATATATAATTCACCGTCTTAGGTCATATTTTTAGTGTGATTAGGCTGGGGCTCTAGGAGCCGAAGGCTTTGGGAATGGAAGCCTTCG

cox31\_II 802 -----  
nad22\_II 879 -----  
nad41\_II 691 -----  
nad44\_II 3025 CGGATCGGCTTACGACAGGTGCTTACACCGAAGCGAAGTTACAGGTTGAGAACCGGGAACCGAAGGCTACCGGGGCTCCGCTAGGCTTGGCGCTTC

cox31\_II 815 -----  
nad22\_II 945 -----  
nad41\_II 691 -----  
nad44\_II 3135 GGTTCGGCTCTTACGACAGGTGCTTACACCGAAGCGAAGTTACAGGTTGAGAACCGGGAACCGAAGGCTACCGGGGCTCCGCTAGGCTTGGCGCTTC

cox31\_II 815 -----  
nad22\_II 1025 -----  
nad41\_II 768 -----  
nad44\_II 3245 AACCTTCGGCTTACGACAGGTGCTTACACCGAAGCGAAGTTACAGGTTGAGAACCGGGAACCGAAGGCTACCGGGGCTCCGCTAGGCTTGGCGCTTC

cox31\_II 815 -----  
nad22\_II 1135 -----  
nad41\_II 825 -----  
nad44\_II 3320 GGTTCGGCTCTTACGACAGGTGCTTACACCGAAGCGAAGTTACAGGTTGAGAACCGGGAACCGAAGGCTACCGGGGCTCCGCTAGGCTTGGCGCTTC

cox31\_II 846 -----  
nad22\_II 1215 -----  
nad41\_II 875 -----  
nad44\_II 3430 CGACGCCCGCTCAGCGGTTGCGGTTTCCCGGTTTACCTTGTACTCGGTTGGCGTCCCGCTGTAGCAGGCTCCACAAGGATAGTTTAAAGGACGCTCCACCTATTGT

cox31\_II 846 -----  
nad22\_II 1215 -----  
nad41\_II 875 -----  
nad44\_II 3540 TAAAGCAAAGTTACGCGCGTCAAGCATCGAACATTTTCAGCTGGCTTCGCAAGCGAAGCCACTCATAGGTTGTAAGCTTTAGAAAATCGCGAGCATGACTTGT

cox31\_II 846 -----  
nad22\_II 1215 -----  
nad41\_II 875 -----  
nad44\_II 3650 CCGCCAGATTGTCATGCTGTTTCTCGGCATCTCTTCTTACGCAATGACTGATAACCGGAGCGGGGAGCGGGTAAGTCGACGGTTGACGTACCGCGGTAGCAAAA

cox31\_II 872 -----  
nad22\_II 1247 -----  
nad41\_II 904 -----  
nad44\_II 3760 GACGGGTACGAATGACGTGAGTTACCTACTCTGATCTATGCAATAGATCGATAACCGGAGCGGGGAGCGGGTAAGTCGACGGTTGACGTACCGCGGTAGCAAAA

cox31\_II 872 -----  
nad22\_II 1247 -----  
nad41\_II 904 -----  
nad44\_II 3870 CTGCCCGCTGGGCAATCGATCTCAAGCGCCTTCTTCGTTGCTTGGAAATGGGGACCCGCTTGGTGTATTGATTGTAACCGGAGCGCTCCGAAAGGTTGATGG

cox31\_II 872 -----  
nad22\_II 1247 -----  
nad41\_II 904 -----  
nad44\_II 3980 TGTGGTCCCAATGGGGGACCCAAAGCCCGAGGCTGAGGCTCCGATGCTCAAAAAGCTTCGTTTATATCTATTAACGAGCCACAGATCTGCAAGGCT

cox31\_II 896 GAGAG -----  
nad22\_II 1286 GAGAG -----  
nad41\_II 937 GAGAG -----  
nad44\_II 4090 GAGAGGGAAGCCCTGGGGGCTTGGTCAAGACTTCCTCGTACCCGGAAGCCCTTGCTTGAATTTCTTGCATCTCAATACGACGTTACTCTGCTCGACGCCGA

cox31\_II 901 -----  
nad22\_II 1291 -----  
nad41\_II 942 -----  
nad44\_II 4200 AGTATAAATCTGTATTCTTGGCGAAGCTCGGGCTTGTATTATGATCTCTATGAGTGGGGTTAATTATAATCTTGAAGAGCCGCTGATAGCCACTATCTTGC

cox31\_II 940 AAGTTCGGCGAGGCTGAGTATGAGC -----  
nad22\_II 1330 AAGTTCGGCGAGGCTGAGTATGAGC -----  
nad41\_II 981 AAGTTCGGCGAGGCTGAGTATGAGC -----  
nad44\_II 4310 AAGTTCGGCGAGGCTGAGTATGAGC -----

cox31\_II 967 -----  
nad22\_II 1357 -----  
nad41\_II 1009 -----  
nad44\_II 4420 CCTTTGACGCTTTGACGACCAAGCGCCTTAGGCTTTATAGCGGGCAGCCTTACAGGCTGTCCACGGGCCTGCTTGAAGGCTTGAAGGCTTGAAGGCTTGAAGGCT

cox31\_II 1007 GCGAACTTCCACTCG -----  
nad22\_II 1401 GCGAACTTCCACTCG -----  
nad41\_II 1042 GCGAACTTCCACTCG -----  
nad44\_II 4528 CTAAATTTGACGCAAA -----

### Group 3:

cob1\_II 1 GTGTGCCGTTGGTCAACCATCCGTTGTAGGCTATCAGGCTACGTATGAAAAGGCTCTAACCTGCATAGGACGACCAAAGGCGAAGGGCTGCAGGGTA  
nad2I\_II 1 GTGCGCCGTTGAGGCTA-TATCCGTTGTAGG-----AACCAAAAAGGCTCGCTCTAACCTGCATAGGACGA-----

cob1\_II 101 ATCGTGGCGACCTGCACGATTTACCCCTAGGGCGGAGCGGTGTGCTTCGCAACCGGTTAGCTTACTGAGCAAGCGAAC TAGTAAATACCTGTGCGCGA  
nad2I\_II 70 -----ACGTTG@CCCC-----

cob1\_II 201 CTAGGCGCAAAAAGGGGCGAAAGGTTGCGAAGCACCTACAGCCGAAGGCCCTCGTGCAGATGCAATGAAATGCACTCGGATTTACGCGCCGGTAAACGAACG  
nad2I\_II 82 -----ACGATGCAGTAAATCAACTCGGATTTACGCGCCGGTAAACGAACG

cob1\_II 301 CGTATAAAGCTCCGACGAGCCCACTTCGTGTGGCCTGTAAACATAGCTCTTGGGTGACTTGTCTACCTAAGGATGATGGATAAGATATGTCCAAGCTGGG  
nad2I\_II 126 CCGTATAAAGCTCCGACGAGCCCACTTCGTGTGGCCTGTAACTACCGTCTCGGGGCACTGTATCAACCTAGGCTGACGGAAAAGATAAGTGGATACTGAG

cob1\_II 401 AAGGTTGACGAATCCGATAGACCGTGAACCGGTTAAACTGGACACCGCGCTGAGG-----AGGCGCGTCCGAGGGGACATCTGGCTATCTGA  
nad2I\_II 226 TAGGTCRACRAAGCCGAAACGCAAGTGAACCCCTTACAAAAGGTCGACCGTACCATCTTACATCGCGCGTGGCGGAGGGAATACTAGCTATCTGA

cob1\_II 492 TATTTATGCGCGATAAACTTGTCTTACCCTCGGGTATCTATGTCTTGGCCTTA-----GAATATCACTTGGAAACAGGACACTGGC  
nad2I\_II 326 TAGGTCRACRAAGCCGAAACGCAAGTGAACCCCTTACAAAAGGTCGACCGTACCATCTTACATCGCGCGTGGCGGAGGGAATACTAGCTATCTGA

cob1\_II 580 TGGATCCAGCCCACTATCGCCCGGAAAGGTCCTAACTTGGGAGTAAAGCTTCAACCAAGGGTATTCAAGTCCGTTGAGGAAAGGACAGCGAGG-----  
nad2I\_II 419 CCGTACTCAGTTTCAATATAGCTTGGGATCAATGCAACCAAGGAGTAAACCAACCGCCGACCAAAATAAGTGTCAAGCAAAATTAGGGAGGCGGAGG

cob1\_II 673 -----AGCCGAGGCTCTTGGAAAGGAAACCTTCGCGGAAGCGGCAAGCACCGGCTTCAACCCGAAGGCCAGG  
nad2I\_II 519 CCTAATATATATATATAGTGGGAGGTTTATCCAAAGGGCTTCCGATGG-----TTCCGCGATTGCTTAAACAGCGGTGGTACTACATAGCCCTCGG

cob1\_II 744 FCTTCAGACCGGGAACCTGCAGTTCCAAACCAACCGAAGCGGCAGGACCTACAGCGGCAACCGGTTAGCGCTACAGTCTTACGGAACCGAAAGGTCCT  
nad2I\_II 614 -----CAAAAGTTAGCAACCGCGGAGCCCGCAGT-TGGCTGGCCTAGT-----ATCTT

cob1\_II 844 GCTTGGCGGTCTACGCGGACGCGCGCTCAGCGGTGTGCTTCGCAACCGGTAGCCCTCAACAGGCGAGCCCTTGCCTGCGTATCTCATCAGTGGT  
nad2I\_II 664 GCTTGGCGGCGAAGTGGCGG-----CTTCAGGGAACCTTACCCATCTGGT

cob1\_II 944 GTGCGAATAGGGTGGTCACTCGAATGGGAACCTAACAACGGTAACCTGTTCGCTTGGTGTCCGCTTTCTCTTGA AAAAGCCAAAGGCCCTATGTCGA  
nad2I\_II 714 AAAACAAGAAGGGCCAAACA-----GTAAAGGAATTAACAACCAACCAAG-----GTCTAAGAAAAGTGCAGCGCCCA-----

cob1\_II 1044 TCAACTTGAGTTGATGAGTGGCAAAATGTAACCTAGTGGCCCGATGGTTTCGAAATCAACTGCATCGAAAGTCAAAAGTGGTCACTCGCTCGTTCGTTGGC  
nad2I\_II 783 -----

cob1\_II 1144 GAGCAACCCGTTCTGCTCGCTAACCGCTTCGCGAAGGGTTACTACAGCCCAAGGCTTGGCTCACAGCTTTTAAATGCACATCGCCCGAGAGGGTGC  
nad2I\_II 783 -----

cob1\_II 1244 GCCGATAACGGTGGTTGGGGAGGACGGAGGCCGATAGGAGTGGGAGGAAGGGTCGCCCTTACTGCAAAATGTAGAAGCCGGAATGACCCGTACAAGCA  
nad2I\_II 783 -----

cob1\_II 1344 ACCAAGATGGGCTAACCAAGTTCGGCCCTTACATAGGATAGACCAACCTGAACCCGGTGGTACTCTTGGCTTCGCGCCGGGTAAAAAGTGGCCCCG  
nad2I\_II 783 -----CTGGCCCTTATAGTACAAAGCAAAAGGTT-----

cob1\_II 1444 CTAGTAACTATCGAATATACCTTGAATGACTTACGCTTGGTTTGGCCCAAGATTTACCAAGCGGCTAGTACAGCAAAATTTAAATTTGAGTGGGTC  
nad2I\_II 812 -----TAGCTAATTCAGCTCTACTTATATGTTTACAAATCTGAGTACCA-----

cob1\_II 1544 CGCTTGTTTATATGATGGATAGCGAATCTTCGGGGGAAACAACGAAGGCBAAGCCGATTGCCCTTGGCTGCGCTAAGAAGCGCCAGGGGGAACGAACC  
nad2I\_II 857 -----GGGACAACGAGGATGCTATG-----ACC

cob1\_II 1644 TAGTGAACAACCCCTGCTCGGTTAGGACTTCCCTTGGCTTGGCCGCGAGCCGAAAGGGCGGGGAGATGTCAGAAATCTGGGTCCGAGCGGTATG  
nad2I\_II 881 AGGCCGTTGGTCCCTTTAAATAAGCAAACTACCGCCGATCACTT-----AATCGGTTGATCTGGTGGAGAGCGTATG

cob1\_II 1744 ACGGGCAACTGTCACTACAGTTCATAGGGCAGGCGCCACCCCTATGGGGTCTCTGACCCCTAC  
nad2I\_II 958 ACGGGCAACTGTCACTACAGTTCAGGGCAGTCA-----CGCTATTAATTAACCTGACCCCTAC

Group 4:

atp82\_II 1 GTGGACCCG-----TTCCGGAGTGAAGC-----GTACGAAGTCGGCACTAT-----  
cox18\_II 1 GTGGAGTCCG-----TTCAATGCAAGACTCCGGACAAATTT-----CAGACCGAATCTGCACTATCT-----  
cox32\_II 1 TTGGGTCGCG-----TTGAGGCTGCAAGTTCCTATGTAACG-----CABAAGGAAACCGTGGCTCCGACGGACGGAC  
rp161\_II 1 GTGGACACAAAGTATGCCITGTATTTGCGCTTGAAGT-----ATAACG-----AAATATTAAGTAGCTGGGCAAT--TCGANA  
nad11\_II 1 GTGGACCCG-----TTCCGGATTAAGCAT--TNGCGAAATTTGACAGCGTGGCAACTGGATCTATATCGGGTCAACTC--CGGACA

atp82\_II 46 -----TTATATGAAGCTGTATGCACTGAAGG-----TGTATGT-----  
cox18\_II 61 -----TGTATGTAAGTCTGCTTGTGAGGG-----TGTATGCGGTTG-----CGCAANNAGTGGTGG  
rp161\_II 71 AACT-----CCAGGGGAGTGAAGTGAAGTCAATGAGGG-----TGTGAATTCGGTTG-----CCCAATATGTCGACG  
nad11\_II 83 CGACTGCGGAGGCTCAGGCGAAT--ACTGAACCTTTATAGGAGATATGGCAAGTCGCTGAATTAAGCAAAAAGGTTTCAGTATATAGTAAATGACAAAT

atp82\_II 79 -----CCATCCCGCTTGTAGAGGGGGTGAAGGACCCGACATATGAGGG-----ATGGCT  
cox18\_II 117 ATATACAA-----GCGCTCCCGCAAGAGGGGGTGAAGGCTTTCCGCAAGGCTTGGCTTCACTAGAAAG  
cox32\_II 135 AAACAA-----GCGCTCCCGCAAGAGGGGGTGAAGGCTTTCCGCAAGGCTTGGCTTCACTAGAAAG  
rp161\_II 177 GGTCCAGCAGCTCATCTTTTGGCCGGGCTTTTGGCAAGGCGTTCCCGCTGAGCAGCGAACCCGAGTCCATGTTCCACACCGTGA--ATGGCC  
nad11\_II 181 CATTTACAGGTGTAAAGCTTGGGTGTCGGGAAGACACAGGTTGTAAGCGGTAGGACCAACGGCGCTCAACATATATTAACAGGCGGAACGGGAGGTT

atp82\_II 131 TTG-CCGG-----  
cox18\_II 185 AGT-CGAGCCAGCGCGGTGCTGACC-----  
cox32\_II 197 ACG-CTGGCCGCTCAATAAACC-----  
rp161\_II 271 GTAGCTCAAGCTTTTCAAGCATGTGACGCATCAAGCTTGACCTAATCAAATGTTAGCCGAGTCTGTCCGGAAGGCTATACGGCCACGCAAGTGTGGGCCCT  
nad11\_II 281 GGT-----CACTAGGTTTGCACCCGTTCCGTTCCGGCCGAA-----AGCGAAACAGCACCCGCT

atp82\_II 138 -----CCACCGGTT-----CTGTGGC  
cox18\_II 208 -----CCCGGGGAGTGGG-----CCGAGGT  
cox32\_II 220 -----CAAGTCCGCGCT-----CTCGAGGT  
rp161\_II 371 GCGGCTGTACCGGCC-----CTGCTATAGCAGCCAGGCGAATGGCGCTTCCGGGGCAAAACCCGAGCACCCTACAGGGC--CCGGGT  
nad11\_II 337 TCGCCCTCGTCCCGCGCTGGCTTCCGAGGGTATCCTAGCAGTAAATGCTATGCTGT-----CGAACGTTTGTCCGGACCT-----TGTATCAGG

atp82\_II 156 ATGAAAGCTGGCGTAAAG-----GATGAAAGCTCTTGGAAAATGAGGCTCGATGAA  
cox18\_II 231 GTGAAGCTGGCGTAAAG-----GATGAAAGCTCTTGGAAAATGAGGCTCGATGAA  
cox32\_II 242 GTGAAGCTGGCGTAAAG-----GATGAAAGCTCTTGGAAAATGAGGCTCGATGAA  
rp161\_II 457 ACGGGCCCGGCTTGAAGCATTTA-----AAATAGAAAATGCAACCCACAACTGTTTC--AGA  
nad11\_II 423 TTAGGGTGGGGTAGAGTGGGAATCAGCTGATGCCCTGGTTTGTAAAGCATTGATCGAGTATAGTAGAACTATGTTCAAACTCCGCTGC--ATA

atp82\_II 208 TCTCCAGCAAAGCGGTGAT-----  
cox18\_II 283 TCCCAAGCAAAGGCGTGAAG-----CTCCGCCCCCGGGAGG-----TAGG  
cox32\_II 290 CTTCTAGCAAAGGCGTGAAG-----CTCGAGGGCAATGAGTATACACAACTCGAGGAGG  
rp161\_II 511 GCTCAGGCGGGGTTGTHACGCACTACTGAGTACCGCAAGTGTGGCGTAAAGTACTAGGCGCTAGTAGTAAATTAGTATTGACCTAAATAGGA  
nad11\_II 520 GTTGGCCAAAGTTCGGCGTG-----TTCAACCCCAATAAACC

atp82\_II 231 GACTTTAAC-----TCTAAA-----CATAG-CACCT  
cox18\_II 320 -----CCGCATAA-CACCTCGA-----  
cox32\_II 346 MAGGTAAAT-----GCCAAACCATGAAATGTTTGTGTTGCTAAGCAAGCTTGGAGAGCTTACCGCATAGTGGCTCGT  
rp161\_II 611 ACGCGTGGGAACCCCATCGCTTCTCAGGGCGCTCTGTGAGAGGCGAAGCGGCTC-AGCGGTTCCGAAACCTGGTGTGGTGGAGGCCAGTATT  
nad11\_II 557 AC-----TAGGGCTC-AGCGTCCGCTTTHCA

atp82\_II 256 -----AAAAGTCTACGATGGCT  
cox18\_II 337 -----AAGAGGCTTACCGATGGCT  
cox32\_II 427 -----AAGAGGCTTACCGATGGCT  
rp161\_II 710 CCGAGTCTGGGTAAACAATGAAAAAGGCGATTGTATAGTAAAGGATTTAGACCTAGTCCATCAACCTGCAAAAGCTAGGGCCACGAAAGAACCTAGCCG  
nad11\_II 586 -----GTACTGTTGTTATGTAAAAAGGGC-----CCGAAAGCCCTACGGGGCCGCTACTCA-

atp82\_II 275 -----AAGCAATTGAGTGAAGTACCTCAA  
cox18\_II 357 -----AA-CRATTHAGTGAAGCTGATTA  
cox32\_II 447 -----AA-CGATTGAGTGAAGTGTCTCG  
rp161\_II 810 AACTATTCTTGCAGTTAGGTAGAGCTCCGCCCTAAAATCGTTGTATACAAGCATAAACTTGGTAAAGCCGCTTGGTGAAGAGCTCGATGGCCAAAGCGGT  
nad11\_II 640 -----GCAACCTGCCAACTTGTGAGCAACCCGACCGAGTGGTCG

atp82\_II 300 -----TATGAGGCTTAGCGTATG-----NAGCANCGTAAATAGGAAAGCAGGGTT--  
cox18\_II 380 -----CCAAGGCGGCCCTTCCGGGAGAAGCTTAAACAAGAGGATGATTGCGAGT--ACGCCACCGTAATATCAAAACGGGTTG-  
cox32\_II 470 -----CCCAAAGCGAGCACCG-----AATG-----ATGGCCGTAAGCCGCAAGCAGGTT-  
rp161\_II 910 CCCCAGTCCCACTTGTGTTTTTTCTAGTTTCCCGCTGTGGGGA-----GACGCTAAGTTCGGTCTAAGTGAATTCGGCAACCTAGCAGC  
nad11\_II 681 -----GACGCTTGGCTGTTACCGGAAAGGCT-----GACGCTTGGCTG--CGGCAAGTAACTCCGTAANNAACCTCA-

atp82\_II 344 -----TAATATTTCCGGTCCCAATTT-----TATACTTTTTCGAAAGTTTATT-----  
cox18\_II 457 -----CTAACTCTTCTGCTGAACTC-----  
cox32\_II 516 -----CCCCAATAGCTCAGCTTCGCAATGCG-----AGCAACCCGCGCCCC  
rp161\_II 1002 -----CTAAGTATAGCGCCGCTTAAGCCTTATATCATATATGATTCTGGAACAGGATAACCCCTTATGGAGTTCCTTCAGACCTAGCAGTTTGAAGTGA  
nad11\_II 751 -----

atp82\_II 366 -----ATGGGAAGACCCCGCAACCGGAATATC  
cox18\_II 502 -----CGCTCCACCGCAACCGCAACCTTAACTTTGAGTTCGAAGACCTTCAATAGTTCAGAGACCCCGCTCCGGAATATC  
cox32\_II 516 -----GCTCCCAACAACAGCACTC-----ACCAACCGTCAATAGTATT  
rp161\_II 1046 TGCTCATCGGTTAG-GCCTTGGCTGGGACAGCGAAGCT-----G-----CGGGCTTGGGGCCGACCGGCGCA  
nad11\_II 845 GCTACGCTAGCGAAGCCCTCGTTCCTGCTCCGAGCGAACC-----CGAATCGAGCCCTGAGGTAAGGCAAG

atp82\_II 395 GAG-----  
cox18\_II 581 GGA-----  
cox32\_II 555 GGA-----  
rp161\_II 1119 GGGGAGCCCTCCACCGAGAGGTAACCTACTAGTGGTGGCCGGTAACAGAGTTCGCCCCCTTTTTTGTGTTGACCTGTAAACCCCTTCGGGGACTCGG  
nad11\_II 916 GCA-----AAGTGCT-----TCGCACCTTCGTTTCTAGAACCTTCGGCTAAGCTTTGGGACCCGA

atp82\_II 398 -----GAGGAGCCTGCGAGGGAT-----GCTATTTTCATAACCCCTCAAGTCTCATATGTTGCTCTCGGTGTA  
cox18\_II 584 -----CAAGGCTTAGCGATATG-----TGATATGCTAT--ATCCGTTTCTTGAAGTCCCTCGGTGTA  
cox32\_II 558 -----CAAGGCTTAGCGATATG-----ATATACCGG--ATATTTCTGTTACGTTGCTCGGCGTA  
rp161\_II 1219 CCGCTCGCTGTCTTAAATGATCGAG--CGAAGCTTAGCTTGTGCTGCTGATCAAGAGGACATGGGGCCCGCCGCTGAGGCGAGGAG  
nad11\_II 973 AGGCT-----TCGAAATAGTTACAGTTCCGAAACCGAAGCGGAGC-----CAAGAGAGG-----CACCGCTCCGCCCCCGGAGCT

atp82\_II 460 TAGG-----AAGAGCTTCCGGTCTAA-----ATAGGTCGATT-----CGGAACGGGAAAGACCAAAAGATCTT  
cox18\_II 644 AAGAGCTTCCGGTCTAA-----ATAGGTCGATT-----CGGAACGGGAAAGACCAAAAGATCTT  
cox32\_II 617 AAGGA-----AAGAGCTTCCGGTCTAA-----ATAGGTCGATT-----CGGAACGGGAAAGACCAAAAGATCTT  
rp161\_II 1316 GCAACCGCGCAGGCTG-CGCGCGCAAGCTTGAAGNA-----AATCGTAGTTCGAAATTAACAACAATAA--CGGGCCGGTAGGAGCTCAG--  
nad11\_II 1053 AAGTTTGGCATAGCGCAAGTTCGGCTTCCATGCTAAAGGTTCTGCGCGGTTGCGAAGCAC-----GCGCT

atp82\_II 521 CCT-----CCA-----  
cox18\_II 705 TGTAAGTGGG-----CAAGCTCGAAGAGGTCGCAAGGTCGCAAG-----CCG-----  
cox32\_II 679 TTCTGTAGTACCCCTCGTTATACCAAGTAAAGCGGGGCAACTTCAAGTGAAGTGGCAG-----ATGT-----  
rp161\_II 1402 -----GAAAGCGAGCTTCAAGCAAGCTAGTCTGTG--CGAAACGCCATCCGAGTATGAACCTCA  
nad11\_II 1123 GCG-----AARGACCGGCTTAGGGTGGGCTGCAAGCTAT-----

atp82\_II 550 ATATCTCTGGGTAGTAGGATGAGATAAAAAGCTAATGCTCCTTGTAAATGAGGTA-----GATATGCTGACGTGTCTCCGGATCACATATAA-  
cox18\_II 751 ATGGCACTTGAAGTGTAGGATGAGGTAAGAAGCTAATGCCAATCTGTAATAGATGT-----GATAGCCACGTAACCTCCGG-----  
cox32\_II 744 ATGGCACTTGAAGTGTAGGATGAGGTAAGAAGCTAATGCCAATCTGTAATAGATGT-----GATAGCCACGTAACCTCCGGGTGGGCAAAA  
rp161\_II 1465 GTACCAATGGGGTAGAGGACACCTTAAAAGCGACTTTCCTAATAGGATCCGGCTTTCGCTAATATCCGTTTATTAAAGTTCTTGCTGTCTTATAGCTG  
nad11\_II 1162 ATACTCTAATGGGGCGGGAATTCGCAAAAAGCCAAAGCCCTGGTCAAAATACAGG-----GATATGCTGACATGGTCACTGAGAAATATGCA

atp82\_II 637 -----  
cox18\_II 827 -----  
cox32\_II 832 AATTTTGTATATTTTATTAGCAGACGCMCTCGCCNCGCTCGATCAGACAATAATCAAGAGGCCACTGCCACGCCAFACTGAAT-----AAH-----  
rp161\_II 1565 GGTCCCTTTTGTGACACTATGCTCGGAAGCACCTAGGGCGTTTG-PATACACTAGCTATCGGGAACCGCCCGCCCTCCAGTACAAAATTAACCCAA  
nad11\_II 1250 GAACTAGCATGGGTCACGAACCTAGTGTAGTGACCAACCGCAATTTGTATTTCGCTAATACACAAAGCCCTCTTCGCTTCCGTTGCGAAGT-----

atp82\_II 637 -----TCGTGCAAGAATGATACTGCCCAFAAG-----AGGGCTAAAMGACCTTTGAGTCAAG-----  
cox18\_II 827 -----  
cox32\_II 919 -----GHAAGAGTCCGATTTATGAGTGTTCACAAAGGCTTAACTACGG-----TGGCGACCAAGCTGGGGGGGCGCGA-----  
rp161\_II 1664 TTTACATAAATGGCCCGCATGAGAAATCAAGCCGAGGTCCTTGGGGCCACCTTCGCTTGTTCGCAACCGGAGACAGAGGGCGATTCCTAGTGT  
nad11\_II 1341 -----GCCCTGCTCGGCGGGGAAACATCTATGTAATCTCACACAGCTACAAGAACAC-----ATTCGGAGAACGAATAGATTAGG-----

atp82\_II 688 -----ATCAGCC  
cox18\_II 827 -----  
cox32\_II 990 -----GCAAGCC  
rp161\_II 1764 CGCGCTCATCGTGC CGGGTAGAGCTAATTTAAATATGTTGGAATGGTTAATTGGTTGGAGTCTCTAGATGTTTATGCAGAAAAAGTTTCATATAAGCC  
nad11\_II 1424 -----ATAAGAA

atp82\_II 695 AATTTAAT-----CATTAAGTCTGG-----ACATTAGTTGTGAGCAGAAACCCAAAGCC-----  
cox18\_II 827 -----AGGC-----ACATGCAAGGCGG-----  
cox32\_II 997 AATACACTTCGGAGGC-----GAAAGCCAAAGGCCCGGCTTGGCGG-----TCTCACGGCTAGGGCCGCCCTTCAGCGGTTCCTATAGCA  
rp161\_II 1864 GAAAGCTCTTAAACCTTAAACAATAAGCCCCAGATGCGCGGGTGACATTACTCGCCCTAGGGCCG-----GAGCTTTGCTGAGCCACACCCGG  
nad11\_II 1431 GCATCGTT-----

atp82\_II 745 -----GACTTCAAGCCCTCTG-----  
cox18\_II 845 -----  
cox32\_II 1078 -----GACAGTCTCCCTTTGGGGGAGCCTTCGCCTT-----  
rp161\_II 1957 AGAGCGAGGGGTTCCCGGTTAATAACACCCGGGGTTTAACTGAGAAATCCCGGAATGGAGGGCCGTAACCTCTGATGCTGATGCTTATGTAGTGCAT  
nad11\_II 1439 -----

atp82\_II 760 -----  
cox18\_II 845 -----  
cox32\_II 1109 -----GCACTCTCGGGGTAAACGAGCCCTTGGGTGTGCTC-----  
rp161\_II 2057 AAGGCGCGCAATCCAGGGTGAAGTCACTGGTAAACGTAAGCAACCTTATGATGCTCCGCCTAAGTGAACAGAGAGCAGTAAAATTTAATGCGCTCGG  
nad11\_II 1439 -----

atp82\_II 760 -----  
cox18\_II 845 -----  
cox32\_II 1143 -----G-----  
rp161\_II 2157 TTGCAGACAATAAGATGATCTGCCAGTATATAATATAGCTAAATAGTTTACATTAGTCAGAGTATGACACAAAATGGTATTGGACCATTGGGTATCT  
nad11\_II 1439 -----GGCTAATT--ACCGAGTTGGGGTGAACACCTCAATGGG-----

atp82\_II 760 -----  
cox18\_II 845 -----  
cox32\_II 1144 -----CITCGCTCGCTCCTGGTTATTCTGT-----GGCTC  
rp161\_II 2257 ATATCGAATGAGTCACTTGGGGTTGCACCTCAGGGTGCTCCTGGTAATCTTATTTTGAAGGCTCACCAATTAAGCGAGCCAGAATTAGCCAACCTGGGCT  
nad11\_II 1475 -----GTTGCTTGTAAACAAGCGAACCCCTTCGAAAATCT

atp82\_II 760 -----  
cox18\_II 845 -----  
cox32\_II 1174 TCGTACTTTCN-----  
rp161\_II 2357 TCGCAGGTTGTTACGCGTACATTCACTTGTTCGTTGCTGCTCGCTTTTTAAAATAAAAAGCGGAATTCGGGGCGAAAGAAGCGCTTTTATTCGCAAGAA  
nad11\_II 1514 CCATAGATTGT-----TCAGATGCATAATAAGAAAAGCATGTCTTGGTGCAATAAGGGGAAGCGGTCC-CCAGTG

atp82\_II 760 -----ANCCCTTATA-CGTAA  
cox18\_II 845 -----C-----  
cox32\_II 1185 AGCAAAACCCGAAAGGCTTCGAAGAAGTTACGGGTGCAAGACCCCTTCGGTCCCGCTCAGCTATGTAGCGCACGGCGGACCTACAGCTTCA-TAAGC  
rp161\_II 2457 TGCAGGCACCCATTACTATAAA-----AATATGCAATACGAAATTC

atp82\_II 776 TCGGAGGAGCTGCAATGAAGGGAACCTTCACGTCAGTCTGAACAGAGGTAGTGGGGAGACCCGCTATCGNCAATAAC-  
cox18\_II 846 TCGGAGGAGCCGTATGACGGGAAACCTTCACGTCAGTCTGAATGGCGGTTAAGAGGGAGACCCCTTCGCCGACATAAC-  
cox32\_II 1198 CGCGAGGAGCCGTATGAGGGGAAACCTTCACGTCAGTCTGAATGGCGGTTAAGAGGGAGACCCCTTCGCCGACATAAC-  
rp161\_II 2556 TTGCTTAGACCCGTGAGGATAAAATTCACAGTACGGTCT-----TCGGGGGGGTTAAACCTATCCCAAC-  
nad11\_II 1628 TGAAGGAGCCGTATGAGGTAAAAGCCTTCACGTACGGTTTGAAGCCGAGCCATTTCAAGGATGCAAGGCTTAGGTTAAC-

Group 5:

atp81\_II 1 CCGCGAGGTTT-----AACCAAGATGGATCGCTAFACTCCA-----TCATACATAAGGGTGGTGTAGACCAACCGCA  
nad42\_II 1 -GTGGCCCGTGTCCCTGCAGTTCGTTGGAACCAAGATCAACTGGCCGGTCTAAGGGCCCTTTCGGCTCGCTGGCA-----AGGGGGAGCTTGGCAA  
rpl161\_II 1 -GTGGCCCGTGTGGCTGATGCTCGTC-----GTGGGGAGCTTGGCAA-----GTGGGGAGCTTGGCAA

atp81\_II 72 TCCGCTTCCGCTAGCCCTCATATGAA-----ATAGGGAGGCCCTAAAAGCAATGGGTGATTCGGTAGAC--  
nad42\_II 75 CCGGTTGGGACATAGGACCAACCTTGGCTCTTTCGCTGCTGTCGGCTTTTAAAAATAAAGCCGAMAGGGACCAACCGAGCCCTGGTAAACTA  
rpl161\_II 45 TCCGCTTCCGCTAGCCCTCATATGAA-----AGGACGCAAAAGAGTGTCTGATTAATGAG

atp81\_II 143 -----GATGMAACTTCTATAAGGGGCTTCHAAAGGGGCAAGCTGTAG  
nad42\_II 195 CTTATCGAGCCTTCTCCACGCTCTAACACGACAGGTCCGATGAATAGTTCGGANAGGCGACCTTGAATAGGGTGGGTAGCTGCGGCGCATAG  
rpl161\_II 106 CT-----TGAGACACAGCCTGTCTAAAAGGGCGGAAAGCATCANGCAAAAG

atp81\_II 188 GGGCAATGGGAAATTCAAAAAGCCGCTTCTCATACCGCACTAACTGGACTAATGGCGCTGTTGC-----  
nad42\_II 295 CAGCGAGTTAGC-----CAGGTC-----GGAGCACCCTGGGNAACGAGACCGACAGAAAGGTCACCGGGAAGACAC--GGGAT--  
rpl161\_II 156 ACACAGAGAGC-----GGGACCTTGAATATTCAAAGAGGCA--GGGACGATGATGACGAAAGCCAGCAATTTTC-----GATTAGC

atp81\_II 260 ---TTTCAACATACGACAAACCGAAAGGGGGTCCAGACCTACGGGGCCACCCATTTTGNAGCCGCTCGGCCGCTCTCTGTTCTCCTCTGCTGA  
nad42\_II 379 ---CTCAGTATAGTACACCGAGG-----GGAGCACCCTGGGNAACGAGACCGACAGAAAGGTCACCGGGAAGACAC--GGGAT--  
rpl161\_II 238 CTTATTCAGTATAGTACACCGAGG-----GGAGCACCCTGGGNAACGAGACCGACAGAAAGGTCACCGGGAAGACAC--GGGAT--

atp81\_II 356 GGC-----GCCAATCCAGGGACACGGATATCGCCCTAAAG--  
nad42\_II 459 ---AAAAATCGAATGGACAGGCTATAGGACTATGGTATAGTGAACGAAATTCATCATAGAGTAAAAAAGTATTGGTTATGGGGTTGA  
rpl161\_II 331 GGGCGCTCCTTAACTTTAAAATTGACTACTCTGGGTAG-----

atp81\_II 392 -----GTGGCTCTATATATAAGTTATGGTCCGCTTC-----ACACACTAGGTTTC  
nad42\_II 548 TACATATGACAGCCGACCATTAACAACCTTATGGCTTTGACCACTGAACACTAGGACGCTGATGCTCGAACTCGACACACTGTCTTAAATTCGA  
rpl161\_II 373 -----GACTCCCAAATTTGGGCTTTCGGTCCGCTTC-----GCTCTCCTTGT

atp81\_II 648 -----TTTTCAAGTACCGAGCTGGTGGCTCCGC-----TGGAAATAAAAACCGTCCGCGTAGTAAAT-----TAAAGAAAGTGA  
nad42\_II 439 GTTCTGGCAGTTTCAAGCTTCCGATATGCTAGCTG-----TGGTGGCCGTTTTCAGGAAAGCGATGGGACCGCAAGTATACCGGCCCA  
rpl161\_II 419 GTCCCTTTTAAAATTTTAAAATAAAGCGCAAAAGCGGATTCGGGGCCAAAGCAAAAGCGGAAAGCGGCGGCGGCGCAAC-----CTGTAAAGCTA

atp81\_II 511 ---GTCCGTTGGGTAAGCCGGAATTAATGCGCTAACCTCTCAGTACGGGGAGA-----AACGTTGGCGAAGGGGCACTCACTCTGCTGAAGGACT  
nad42\_II 746 GGTTCATATGAGAGGCTTCCGATGCGCA-----TGGTGGCCGTTTTCAGGAAAGCGATGGGACCGCAAGTATACCGGCCCA  
rpl161\_II 513 CGGCTTCCAGAGGACCACTAAGAA-----CAACCACTGCAAGT-----GTAAGCGG-----AGGTCAGC

atp81\_II 603 TTTAAGCCCAACCGATGCTTGGCCATAT-----GGGCATGTGGCCCT--  
nad42\_II 810 CTAATGACCTAGTCAAGGATTTATGAAAAATAAACCAACCTATCTCCAAATGACCAACCAAGCGAAAAAGGACCCGGGACAAACCAATAATCGAG  
rpl161\_II 573 AAATAACCTGGCTCTTAAAGTATG-----TACTTGGCCGGCTTTCACCTATATAC

atp81\_II 645 -----TTCGCTTCCGACCTC-----GTAAAGGCHCAAGCAGGCCCT--  
nad42\_II 910 AAATCGTATAGGGTTTTTCGGAATTCATATGCTCTCAAAATATGCTGAATTAGCTATAAAGGTTACACAGGCTACCTTGTGACCCGAAATAAAA  
rpl161\_II 627 -----TCGGTTCGCAAAAT-----CCGACGCTAATAGTGAACCTTCTCAAA

atp81\_II 683 -----TGGATCACCCGAAAGAAATC-----CTATCCCGGCAATCACTTTC  
nad42\_II 1010 TGGACACTCAAAATCAATGGCACTTCCAGTTCGCAACCAAGCGCTAGCAGTCAATTAACCTTGTCTATGCGAAAGCCCGCTGATTAACAGGG  
rpl161\_II 671 GAATGCCATTAATTCAGAGGGGCTCTGGGATAAACGATTC-----CCGAGCTAATAGTGAACCTTCTCAAA

atp81\_II 723 CTGACAC-----ACCTGGGCAAAACCCGACGCGAGGCTAGCTTT--  
nad42\_II 1110 GGGATTTGCTACTCTACTTAGATATTTATTTTTCGACGCTCTACTTTTATTAATGCAAGGTCAGCTATTCGCGGACCTTCAATTTATCATAGGA  
rpl161\_II 735 GGGATTCC-----CTTCAAGGGAAAAAATAAGCAAGATCTCTATC

atp81\_II 765 AGACCAAGCCGCTGGAGAGCCCGAATAT-----ATCGCTTTTAAAGGAAATTCGGGTAGCAAGCGCTAGCCCTTTTAGCGGAAACTGACAGAGCC  
nad42\_II 1210 TTTTTCAGCCGCTGGTGGGCTCGGTC-----TGGTGGCCGTTTTCAGGAAAGCGATGGGACCGCAAGTATACCGGCCCA  
rpl161\_II 777 CAGGCACTTAAATTCAGAGGGGCTCTGGGATAAACGATTC-----CCGAGCTAATAGTGAACCTTCTCAAA

atp81\_II 862 AATTGACG-----GGACCGAAGCGGCAAGCACCTAG--AG  
nad42\_II 1310 AAGCAATATTTCGAAGTGAAGCAGCGATAGCGAGCTTATTTTTCCTTTTCGTTCAAGTGTGCACGCTACCGCTGCAACTATGGGTTCAATGGG  
rpl161\_II 868 -----AGGACAGGGGCAAGGCTCAATTAAGCAT-----ATAAAGGGGACACTGG

atp81\_II 897 GGGACCGGCTCCGCC-----TTCGAGCAGCTGGGCTGATGGGTA  
nad42\_II 1410 CACTAATCAGCTAATTTGCCGAAGGGATTAATGATGGGCTCACTAATTAAGGCCCACTAATTTGATAAAGCATAAGCTAGCAGCTAACAAAGTTA  
rpl161\_II 919 AATCACTATCTATTTC-----AATATTCAATGTTTATACAAAA

atp81\_II 942 TCAATATTATTAAGCCGCTTGCAGTACCTCCGGTACT-----TGGCAACCTTGCATAGT  
nad42\_II 1510 TTTGATTAACCACTTCAACTATGTTGTTGGCTTTAAGTATTGCTTCTTGGTATGCCCCTTTACGCAATAGGAAACCGCTGAGCGGCGCT  
rpl161\_II 962 TTTGGGTAAGTCAAGGCTCATGATCATCTGGAAGCTGAGCAAAAACTCA-----GATAGAGCAAGGCAATGGC-----CTAGGCTGATC

atp81\_II 1002 -----GCAGGCAACCCGAGGCTTGGAGAGCGANGIT-----GCAAGGAGCCGCTCCGCTTGGGCTCAAGTAA  
nad42\_II 1610 AAGCCGCGCAGGCTCCCTTGGAGGCACTAAGCAAGAGGAGGTGATCCTTGGTTTTTGGCTATAATGTGACTGGCCGCACTTGGCCTCAAGTAA  
rpl161\_II 1046 AAGCCGCGCAGGCTCCCTGAGTGGTAAAGGCTGAGC-----CTGATG

atp81\_II 1075 CTTGGCTTTGGGCAACCGG-----CAAAGCAATTAATCTAGTGAAGCAAGCCCTTGGCTTAAAGTGTGGGCTTAGTAGCTCAATTAAGAGGCT  
nad42\_II 1710 ACAAAGGCTTGGGCTTCCAG-----AAGTAAATCTCGAAGAGTGA-----GATTACAGCAGACCC  
rpl161\_II 1093 ACAAGGCTTAAAG-----AAGTAAATCTCGAAGAGTGA-----GATTACAGCAGACCC

atp81\_II 1097 -----TCCCGTCAACCACTTAGTCTTTCGCGGCGCAGCGAACCTAAAGTTCGGCAGATCTG  
nad42\_II 1810 TATGACATTTAACTGTACGATAGTTTCGGAGGCAAGGCGCAGAGCTCGCTAAATATGATTGCTAGC-----GTTAGCAGCTCCGCTTCTAGTGA  
rpl161\_II 1147 CCGAGGGC-----AAGGCGCTCCCTGGGGCCCTGAGCCATTAATCGGTTGGCTAGCGGCTTCTAGCTATTGA

atp81\_II 1157 CAGCGAAGCCGGACCTACGAGCAGC-----GCTTGGCTTAGACTTGGCTGAG--CGGCTTATTCTCAGCAGC  
nad42\_II 1908 GCTTCACTAGGAGGCTGGCTGCTCACACCGAAGGCAAGGAAACCGCTTGGCCATGCTCAACCCCGGTGGGAAAG--ACCCTGTTCTCAGCTGTC  
rpl161\_II 1226 GTATTTCGCCGCGCAGCGGTT-----CGATAAGACAGGAGGTTAGCAAGAGCGGAACTTTTGGCTGCAAGCAAGCCACTGCGGCTG

atp81\_II 1227 GGCACCGAATATGACCTTGGAGGCGCTCCATGGCCAGCGGTTGCAATCCACGCGGACCGCCGCTCCGGGTGTGCTTCGCANCCGCTCAT  
nad42\_II 2007 GCTTGGCT-----CAGCAAGCTCCGAGGCTTGGCA-----AACGATAGCCTTATGGGCGCAAAAGT-----GCCTCCGCACTATTAAGGTTGCT  
rpl161\_II 1318 CTATTGT-----AAGCACTTCAAGGCGAGCCCTCTT-----AAGTATCCATTAAGTTCAGAGAGATCAG-----TCGCTTCTGCTTCAACCATTAACAT

atp81\_II 1327 GGGTTCGCTTTCAGAGAACAG-----TGAACCGAGGCTCATCGAAGAGCGGAAAGGAGAGGTTT  
nad42\_II 2096 TCTTATGCTACTACGCAAGGGGACCTCACCGGTTTCAAGCTC-----AGCAAGCGAAGGCAAGCAGCTGTTGGCTTGCCTTGGAGTCACTGCTC  
rpl161\_II 1407 TACATGCAACTCAGAGGAGAGG-----TGCATCTCACTAG-----TGAAGCGAAGGAGGAGTACAG-----CGC

atp81\_II 1394 -----AAATTTGGCCGCTTGGCA  
nad42\_II 2191 TATTTGCTCAACCGGCTTCGAGGCTTCGAAAGCAAGGGGCAAGGTTTACCTAAAGCGAGGCTTCTGAGGCTCCAGGCGCTCAGG  
rpl161\_II 1474 TATTTGCTCAACCGGCTTCGAGGCTTCGAAAGCAAGGGGCAAGGTTTACCTAAAGCGAGGCTTCTGAGGCTCCAGGCGCTCAGG



```

atp81_II 1415 AGGTAAAACCACTTCGCAAGCGAAGAAATAGCTGCAAGCTTGAAGTTCCGCTGCATAGGTTCTGGCCCTC-----
nad42_II 2291 ATGTAAAGCACCTTGTCTGAAAGCTTCTCAGCTAGCGAAGGGCCACCGGGCTTGGCTCCTCCGCCCCCGAAGGGTGCATGAAAGCCGAAGGCCAANGG
rp1161_II 1525 G-----ACCTTCTGACCAAGTAAACCATGATTTTGGGTCT-----GCATTAAC

atp81_II 1482 -----GACCTTCTCCAAAGGCCCCCGCAG-----EGCTTATGTTTAACTTGGTCAACATAA
nad42_II 2391 CCTACAGGCTCTTCCCTAAAAGGCTTCCAGTGGTGGCCANGGAGCCGTGCTTGGCGGTCTCACGGCTAGGCCGCCCTCAAGCTTCCGGTTCAGAGCGA
rp1161_II 1567 TATACAGG-----CAAAGGTGATTTTITTTAAACACCCTTGAGTGC-----CTCGGGTGTTCGGTTCAGCCCTE

atp81_II 1531 GGCTAACGGATGAGCCTTGGTCACGCACACCATTTATCTACACAAGGTAGGGCAACTTACTGCTAAGATGAAAAAGCGTGCAGCCGTAT-----
nad42_II 2491 GGCACTCGGTATGACATGGGAAGAAGGCGTCCACTGATGTCTANAACCTGATAGAC-----CGGAAAGGCATTCATGTAAGCCCGATCGCCCGGC
rp1161_II 1633 GCCAC-----TATTAACATAGAAATTCGGTGGGTGACCGGCACAAAGAGAT-----CGCAGGCGGAG-----AGCCGTAT-----

atp81_II 1623 -----GATGGGTAAACATACAGTACGGTTACGAGAGGGGGCCCTGAGGGCCCGCAATGCTE
nad42_II 2585 ACCTTCACTCAACCGAAGTCCACAAGACCACCCGAAGGGCGAACGGTGTGCTCGCAACCGGTTCCGAACCTGGTC-----AGCAACTATCTGCC
rp1161_II 1699 -----GAAACGATAAATTCATGTACGGTTCGGAGGGCAGTA-----

atp81_II 1681 ATTACCCGTH-----GTGATAGCCGGAAGGGTTTCTAATCTA-----
nad42_II 2678 GTTATCCACTACTAGGTGGCTAACCAAGCCGTAAAAAGGGGCTCGGCCCTGACCCCTAC
rp1161_II 1735 -----CCACTGACCCCAT

```
