# Supplementary material for: The inflated mitochondrial genomes of siphonous green algae reflect processes driving expansion of noncoding DNA and proliferation of introns
Source: PeerJ. 2020 Jan 3;8:e8273. doi: 10.7717/peerj.8273 (PMC6944098; doi:10.7717/peerj.8273)
Supplement: Supplemental Information 6 [file peerj-08-8273-s006.xlsx]

## Sheet: Sheet1
Table S3: Comparison of protein coding and ribosomal RNA genes in the mitochondrial genomes of a selection of Chloroplastida including Ostreobium quekettii SAG6.99.
	Ulvophyceae			Chlorophyceae			Prasinophytes			Pedinophytes	Trebouxiophyceae		Streptophyta
	Ostreobium	Caulerpa lentilifera	Ulva fasciata	Chlamydomonas reinhardtii	Gonium pectorale	Dunaliella salina	Ostreococcus tauri	Cymbomonas tetramitiformis	Nephroselmis olivacea	Pedinomonas minor	Prototheca wickerhamii	Botryococcus braunii	Arabidopsis thaliana	Chara vulgaris
Accession		KX761577.1	NC_028081.1	NC_001638.1	NC_020437.1	NC_012930.1	NC_008290.1	NC_036614.1	NC_008239.1	NC_000892.1	NC_001613.1	NC_027722.1	NC_037304.1	NC_005255.1
size(bp)	241739	209034	61614	15800-18900	15993	28331	44237	73520	45223	25137	55328	84583	367808	67737
tRNAs	28	20	27	3	3	3	26	23	26	9	26	23	22	26
rrn5	y	y	n	n	n	n	y(d)	n	y	n	y	y	y	y
rrnS	y(1)	y	y	y(4 segments)	y(4 fragments)	y(3 fragments, S2 has 2 introns)	y(2 segments, duplicated)	y(d)	y	y	y	y	y	y(1)
rrnL	y(7)	y	y	y(8 segments, L5 has 1 intron, L7 has 1 intron)	y(8 fragments)	y(6 fragments, L5 has 1 intron, L6 has 3)	y(d)	y	y(3)	y(2 fragments, L1 has 1 intron)	y(2)	y(1)	y	y(9)
rnpB	n	n	n	n	n	n	y	n	y	n	n	n	n	n
atp1	y(2)	y(2)	y	n	n	n	y	n	y	n	y	y	y	y
atp4	y	n	y	n	n	n	y(d)	y	n	n	n	y	y	y
atp6	y(1)	y(2)	y	n	n	n	y	y	y	y	y	y	y	y
atp8	y(2)	y(1)	y	n	n	n	y(d)	y	y	y	y	y	y	y
atp9	y	y(2)	y	n	n	n	y	n	y	n	y	y	y	y(2)
cob	y(3)	y(2)	y	y(1)	y	y(4)	y(d)	y	y(1)	y	y	y	y	y(3)
cox1	y(11)	y(5)	y(3)	y(2)	y	y(5)	y(d)	y(2)	y	y	y(3)	y	y	y(6)
cox2	y	y(1)	y	n	n	n	y	y	y	n	y	y	y(1)	y(1)
cox3	y(2)	y	y	n	n	n	y	y	y	n	y	y	y	y
nad1	y(1)	y(1)	y	y	y	y(1)	y	y	y	y	y	y	y(4)	y
nad2	y(3)	y(1)	y	y	y	y	y	y	y	y	y	y	y(4)	y
nad3	y	y	y(1)	n	n	n	y	y	y	y	y	y	y	y(2)
nad4	y(4)	y(4)	y	y	y	y	y	y	y	y	y	y	y(3)	y(1)
nad4L	y	y	y	n	n	n	y(d)	y	y	y	y	y	y	y
nad5	y(3)	y(3)	y	y	y(1)	y(2)	y	y	y	y	y	y	y(4)	y
nad6	y	y	y	y	y	y	y	y	y	y	y	y	y	y
nad7	y(2)	y(4)	y	n	n	n	y	y	y	n	y	y	y(4)	y
nad9	y	y(1)	y	n	n	n	y	y	y	n	y	y	y	y
nad10	y	n	n	n	n	n	y	n	y	n	n	n	n	n
rpl2	n	n	n	n	n	n	n	n	n	n	n	n	y(1)	y
rpl5	y	n	y	n	n	n	y	y	y	n	y	y	y	y
rpl6	y(1)	n	n	n	n	n	y	y	y	n	y	n	n	y
rpl14	y	n	n	n	n	n	y	y	y	n	n	n	n	y
rpl16	y(1)	n	y	n	n	n	y	y	y	n	y	y	y	y
rps1	n	n	n	n	n	n	n	n	n	n	n	n	n	y
rps2	y(1)	n	y	n	n	n	y	y	y	n	y	y	n	y
rps3	y(1)	n	y	n	n	n	y	y	y	n	y	y	y(1)	y(1)
rps4	y	n	y	n	n	n	y	y	y	n	y	y	y	y
rps7	y(1)	n	n	n	n	n	y	y	y	n	y	y	y	y
rps8	n	n	n	n	n	n	y	y	y	n	n	n	n	n
rps10	y	n	y	n	n	n	y	y	y	n	y	y	n	y
rps11	y	n	y	n	n	n	y	y	y	n	y	y	n	y
rps12	y	n	y	n	n	n	y	y	y	n	y	y	y	y
rps13	y	n	y	n	n	n	y	y	y	n	y	y	n	n
rps14	y	n	y	n	n	n	y	y	y	n	y	y	pseudogene	y
rps19	y	n	y	n	n	n	y	y	y	n	y	y	pseudogene	y
tatC/	y	ORF233	n	n	n	n	y	n	y	n	n	y	y	n
mttB
sdh3	n	n	n	n	n	n	n	n	n	n	n	n	n	y
sdh4	n	n	n	n	n	n	n	n	n	n	n	n	pseudogene	y
yejR	n	n	n	n	n	n	n	n	n	n	n	n	n	y
yejU	n	n	n	n	n	n	n	n	n	n	n	n	n	y
yejVc	n	n	n	n	n	n	n	n	n	n	n	n	n	y
ccmB	n	n	n	n	n	n	n	n	n	n	n	n	y	n
ccmC	n	n	n	n	n	n	n	n	n	n	n	n	y	n
ccmFc	n	n	n	n	n	n	n	n	n	n	n	n	y(1)	n
ccmFN	n	n	n	n	n	n	n	n	n	n	n	n	y	n
Reference	This study	(Zheng et al., 2018)	(Melton III & Lopez-Bautista, 2016)	(Michaelis et al., 1990; Smith et al., 2010)	(Hamaji et al., 2017)	(Smith et al., 2010)	(Robbens et al., 2007)	(Satjarak et al., 2017)	(Turmel et al., 1999)	(Turmel et al., 1999)	(Wolff et al., 1994)	(Zou & Bi, 2016)	(Unseld et al., 1997)	(Turmel et al., 2003)
Hamaji T, Kawai-Toyooka H, Toyoda A, Minakuchi Y, Suzuki M, Fujiyama A, Nozaki H, Smith DR. 2017. Multiple independent changes in mitochondrial genome conformation in chlamydomonadalean algae. Genome Biology and Evolution 9: 993-999.
Melton III JT, Lopez-Bautista JM. 2016. De novo assembly of the mitochondrial genome of Ulva fasciata Delile (Ulvophyceae, Chlorophyta), a distromatic blade-forming green macroalga. Mitochondrial DNA Part A 27: 3817-3819.
Michaelis G, Vahrenholz C, Pratje E. 1990. Mitochondrial DNA of Chlamydomonas reinhardtii: the gene for apocytochrome b and the complete functional map of the 15.8 kb DNA. Molecular and General Genetics 223: 211-216.
Robbens S, Derelle E, Ferraz C, Wuyts J, Moreau H, Van de Peer Y. 2007. The complete chloroplast and mitochondrial DNA sequence of Ostreococcus tauri: organelle genomes of the smallest eukaryote are examples of compaction. Molecular Biology and Evolution 24: 956-968.
Satjarak A, Burns JA, Kim E, Graham LE. 2017. Complete mitochondrial genomes of prasinophyte algae Pyramimonas parkeae and Cymbomonas tetramitiformis. Journal of Phycology 53: 601-615.
Smith DR, Lee RW, Cushman JC, Magnuson JK, Tran D, Polle JE. 2010. The Dunaliella salina organelle genomes: large sequences, inflated with intronic and intergenic DNA. BMC Plant Biology 10: 83.
Turmel M, Lemieux C, Burger G, Lang BF, Otis C, Plante I, Gray MW. 1999. The complete mitochondrial DNA sequences of Nephroselmis olivacea and Pedinomonas minor: two radically different evolutionary patterns within green algae. The Plant Cell 11: 1717-1729.
Turmel M, Otis C, Lemieux C. 2003. The mitochondrial genome of Chara vulgaris: insights into the mitochondrial DNA architecture of the last common ancestor of green algae and land plants. The Plant Cell 15: 1888-1903.
Unseld M, Marienfeld JR, Brandt P, Brennicke A. 1997. The mitochondrial genome of Arabidopsis thaliana contains 57 genes in 366,924 nucleotides. Nature Genetics 15: 57.
Wolff G, Plante I, Lang BF, Kück U, Burger G. 1994. Complete sequence of the mitochondrial DNA of the chlorophyte alga Prototheca wickerhamii: gene content and genome organization. Journal of Molecular Biology 237: 75-86.
Zheng F, Liu H, Jiang M, Xu Z, Wang Z, Wang C, Du F, Shen Z, Wang B. 2018. The complete mitochondrial genome of the Caulerpa lentillifera (Ulvophyceae, Chlorophyta): Sequence, genome content, organization structure and phylogenetic consideration. Gene 673: 225-238.
Zou J, Bi G. 2016. Complete mitochondrial genome of a hydrocarbon-producing green alga Botryococcus braunii strain Showa. Mitochondrial DNA Part A 27: 2619-2620.
