# Supplementary material for: The inflated mitochondrial genomes of siphonous green algae reflect processes driving expansion of noncoding DNA and proliferation of introns
Source: PeerJ. 2020 Jan 3;8:e8273. doi: 10.7717/peerj.8273 (PMC6944098; doi:10.7717/peerj.8273)
Supplement: Supplemental Information 7 [file peerj-08-8273-s007.xlsx]

## Sheet: Sheet1
Table S4: Introns and associated ORFs within mtDNA of Ostreobium quekettii SAG6.99.
GENE		1	2	3	4	5	6	7	8	9	10	11
cox1	RNAweasel	intron I (derived, B1)	intron II (domainV)	intron II (domainV)	intron II (domainV)	intron ID	No	intron IB (complete)	intron II (domainV)	intron IB	intron IB (3', partial)	intron II (domainV)
	Rfam	No	intron II	intron II	intron II	No	No	No	intron II	No	No	No
	ORF		ORF113	ORF698	ORF576	ORF144, ORF231		ORF328			ORF257	ORF617
	ORF Pfam domains		LAGLIDADG_2	Intron_maturas2	Intron_maturas2	ORF144: LAGLIDADG_1 ORF231: LAGLIDADG_2		LAGLIDADG_1			LAGLIDADG_1 and LAGLIDADG_1 (2 domains)	Intron_maturas2
	Position in gene	283-1433	1542-4185	4440-8629	8647-12307	12356-14767	14779-15949	16098-17350	17359-18284	18309-20936	21144-22658	22691-26054
	C. lentilifera intron						cox1_1 (type I) – exact match	cox1_2 (type I)			cox1_3 (type I)
atp1	RNAweasel	intron II (domainV)	intron II (domainV)
	Rfam	intron II	No
	ORF	ORF714	ORF1168
	ORF Pfam domains	RVT_1 and Intron_maturas2	LAGLIDADG_2, RVT_1, and Intron_maturas2
	Position in gene	1009-3515	3606-7652
rrnL	RNAweasel	intron IA3	intron IB (complete)	intron IB (5', partial)	intron IB (complete)	intron I (derived, B1)	intron IB (complete)	intron IA
	Rfam	no	no	No	No	No	No	No
	ORF	ORF215	ORF109, ORF139		ORF300	ORF279	ORF103	ORF175
	ORF Pfam domains	LAGLIDADG_2	ORF109: LAGLIDADG_1, ORF139: LAGLIDADG_1		LAGLIDADG_1 and LAGLIDADG_1	LAGLIDADG_1 and LAGLIDADG_1	LAGLIDADG_2	LAGLIDADG_2
	Position in gene	1072-2767	3080-4413	5206-6024	6038-7424	7468-9279	9584-10893	11080-12188
rrnS	RNAweasel	No
	Rfam	No
	ORF	ORF268
	ORF Pfam domains	LAGLIDADG_2
	Position in gene	714-1858
cob	RNAweasel		intron II (domainV)	intron IB (complete)
	Rfam	intron II	intron II	No
	ORF		ORF626
	ORF Pfam domains		RVT_1, HNH and GIIM
	Position in gene	90-1896	2083-4710	4957-6399
nad7	RNAweasel	intron II (domainV)	intron II (domainV)
	Rfam	No	intron II
	ORF	ORF963
	ORF Pfam domains	RVT_1 and GIIM
	Position in gene	226-3214	3819-4866
rps2	RNAweasel	No
	Rfam	No
	Position in gene	493-1920
nad5	RNAweasel	No	intron II (domainV)	intron IB (3', partial)
	Rfam	No	intron II	No
	Position in gene	22-4588	4876-8249	8695-10185
atp8	RNAweasel	intron II (domainV)	intron II (domainV)
	Rfam	intron II	intron II
	Position in gene	161-1879	2169-3024
nad1	RNAweasel	intron II (domainV)
	Rfam	intron II
	Position in gene	364-2071
nad4	RNAweasel	intron II (domainV)	intron II (domainV)	intron II (domainV)	intron II (domainV)
	Rfam	intron II	No	intron II	intron II
	Position in gene	339-1394	1454-4191	4330-5375	6198-10742
	C. lentilifera intron		nad4_1 (type II)	nad4_2 (type II)
cox3	RNAweasel	intron II (domainV)	intron II (domainV)
	Rfam	intron II	intron II
	Position in gene	575-1598	1750-3028
rpl6	RNAweasel	intron II (domainV)
	Rfam	intron II
	Position in gene	280-2901
nad2	RNAweasel	intron II (domainV)	intron II (domainV)	intron II (domainV)
	Rfam	intron II	intron II	No
	Position in gene	142-1158	1347-2762	3914-5516
rpl16	RNAweasel	intron II (domainV)
	Rfam	intron II
	Position in gene	270-2017
rps3	RNAweasel	intron II (domainV)
	Rfam	intron II
	Position in gene	85-4724
rps7	RNAweasel	No
	Rfam	No
	Position in gene	166-650
atp6	RNAweasel	intron II (domainV)
	Rfam	intron II
	Position in gene	40-2692
